# Supplementary material
Source: publisher site journal article supplement (https://www.dovepress.com/article/262558)
Supplement: Supplementary file 1 [file get_supplementary_file.php]

**SUPPLEMENTAL INFORMATION**

**Supplemental table 1: Fibrotic Liver Disease (FOLD) Consortium sites**

| *Baylor, Scott & White Health, Temple TX* |
| --- |
| *Essentia Health. Duluth MN* |
| *Geisinger Health System , Danville PA* |
| *Henry Ford Health System, Detroit MI* |
| *Kaiser Permanente Hawai'I, Honolulu HI* |
| *Kaiser Permanente Institute for Health Research of Colorado, Denver CO* |
| *Kaiser Permanente Mid-Atlantic Research Institute, Rockville MD* |
| *Kaiser Permanente Northwest, Center for Health Research, Portland OR* |
| *Kaiser Permanente Southern California, Los Angeles CA* |
| *Marshfield Clinic Research Foundation, Marshfield WI* |
| *Palo Alto Medical Foundation Research Institute, Palo Alto CA* |

**Supplemental table 2: Classification accuracy (area under the receiver operating characteristic curve [AUROC]) of additional machine learning methods.**

| **Machine-leaning models** | **AUROC**** |
| --- | --- |
| KNN (K-Nearest-Neighbor)* | 0.70 |
| Radial support vector machines* | 0.70 |
| polynomial support vector machines* | 0.71 |
| Neural network* | 0.68 |
| Random forest* | 0.77 |
| xgbTree model* | 0.82 |
| LASSO model | 0.83 |
| **missing data were imputed using multiple imputation approach* |  |
